# Supplementary material
Source: PubMed Central journal article supplement (PMC2850011)

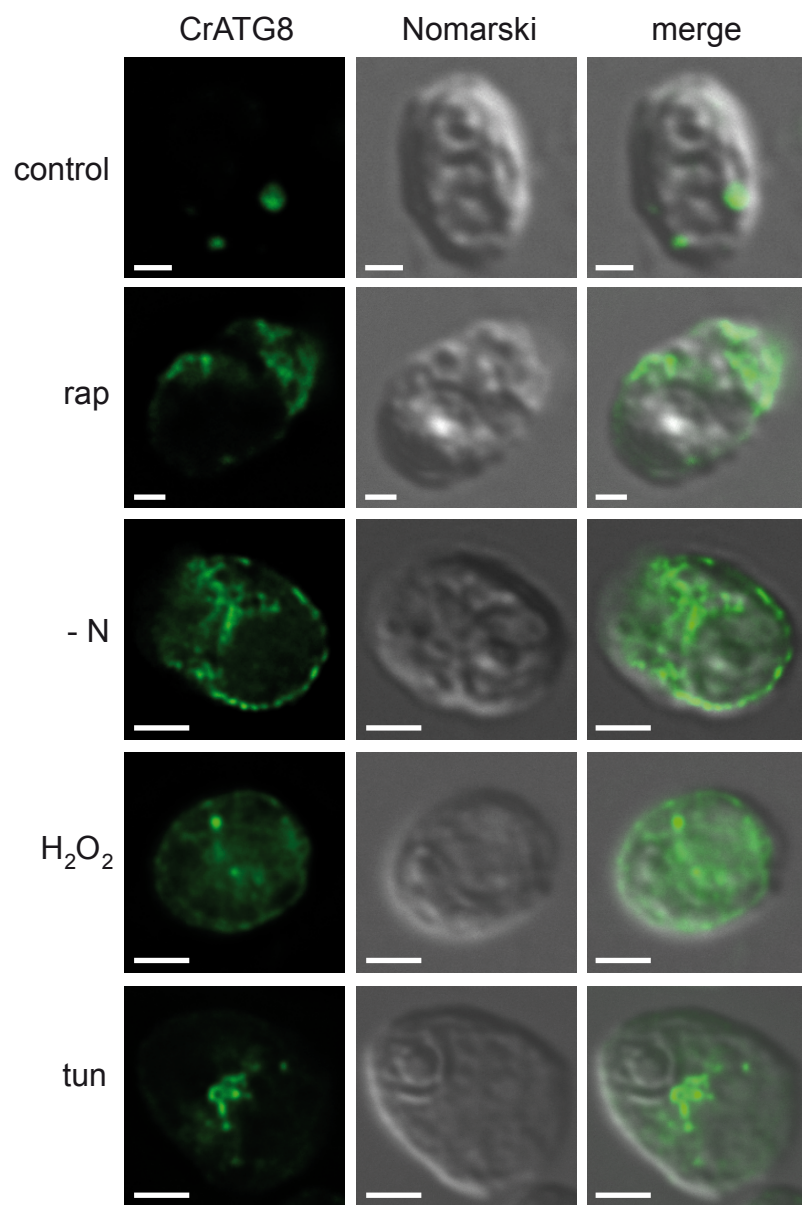

Suppl. Figure S1

Supplement: pp.109.152520_1.pdf [file pp.109.152520_1.pdf]
